# Supplementary material for: The clock gene PER1 plays an important role in regulating the clock gene network in human oral squamous cell carcinoma cells
Source: PubMed Central journal article supplement (PMC5342553; doi:10.18632/oncotarget.11844), 2016-09-02
Supplement: oncotarget-07-70290-s001.pdf [file oncotarget-07-70290-s001.pdf]

## The clock gene *PER1* plays an important role in regulating the clock gene network in human oral squamous cell carcinoma cells

### SUPPLEMENTARY FIGURE AND TABLE

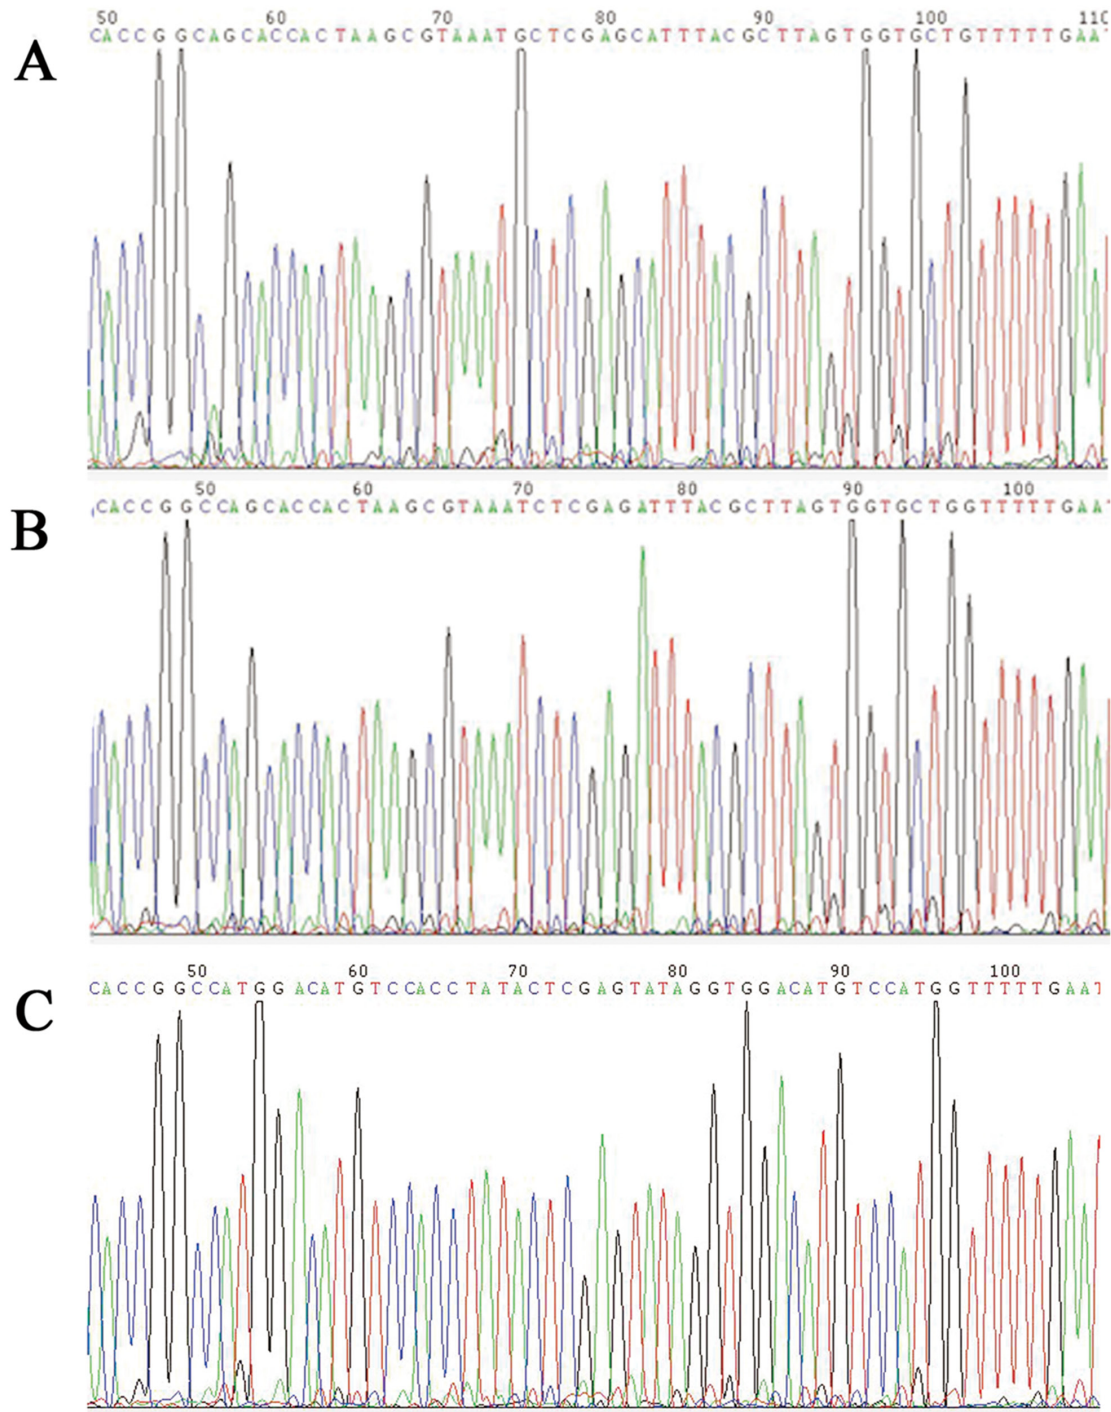

**Supplementary Figure S1: DNA sequencing results of lentivirus *PER1*-shRNA plasmids. A. *PER1*-shRNA-I; B. *PER1*-shRNA-II; C. *PER1*-shRNA-III.**

**Supplementary Table S1: Sequences of PER1-shRNA interference**

| <b>Group</b>   | <b>Sense strand</b>                                               |
|----------------|-------------------------------------------------------------------|
| PER1-shRNA-I   | 5'-CCGGCAGCACCACCTAAGCGTAAATGCTCGAGCATTACGCTTAGTGGTGCTGTTTTTG-3'  |
| PER1-shRNA-II  | 5'-CCGGCCAGCACCACCTAAGCGTAAATCTCGAGATTTACGCTTAGTGGTGCTGGTTTTTG-3' |
| PER1-shRNA-III | 5'-CCGGCCATGGACATGTCCACCTATACTCGAGTATAGGTGGACATGTCCATGGTTTTTG-3'  |
